# Supplementary material for: Carriage of multi-drug resistant bacteria among foreigners seeking medical care
Source: PubMed Central journal article supplement (PMC6013425; doi:10.1038/s41598-018-27908-x), 2018-06-21
Supplement: 41598_2018_27908_MOESM1_ESM.pdf [file 41598_2018_27908_MOESM1_ESM.pdf]

## **Carriage of multi-drug resistant bacteria among foreigners seeking medical care**

Shmuel Benenson, MD, MSc,<sup>1</sup> Ran Nir-Paz, MD,<sup>1</sup> Mordechai Golomb, MD,<sup>2</sup> Carmela Schwartz, RN, MPH,<sup>1</sup> Sharon Amit, MD, PhD,<sup>1</sup> Allon E Moses, MD,<sup>1</sup> and Matan J Cohen, MD, PhD<sup>1,3</sup>

<sup>1</sup>Department of Clinical Microbiology and Infectious Diseases, <sup>2</sup>Heart Center, Hadassah-Hebrew University Medical Center, <sup>3</sup>Clalit Health Services, Jerusalem district, Jerusalem, Israel

**Supplementary table and figure**

**Supplementary Table 1. Distribution of MDR bacteria positivity among study groups, stratified per age and time from hospital arrival**

| Age group (years) | Time from arrival    | Israeli N (%) | East Jerusalem N (%) | Palestinian N (%) | Foreign N (%) | Total N (%)   |
|-------------------|----------------------|---------------|----------------------|-------------------|---------------|---------------|
| Up to 18          | MDR up to 96 hours   | 107 (0.5%)    | 94 (1%)              | 34 (5.2%)         | 4 (2.5%)      | 239 (0.7%)    |
|                   | MDR 96 hours to week | 9 (0%)        | 11 (0.1%)            | 8 (1.2%)          | 3 (1.9%)      | 31 (0.1%)     |
|                   | MDR more than week   | 93 (0.4%)     | 58 (0.6%)            | 34 (5.2%)         | 5 (3.1%)      | 190 (0.6%)    |
|                   | no MDR bacteria      | 21425 (99%)   | 9685 (98.3%)         | 577 (88.4%)       | 150 (92.6%)   | 31837 (98.6%) |
| 18 to 40          | MDR up to 96 hours   | 106 (0%)      | 41 (0%)              | 37 (10%)          | 15 (10%)      | 199 (0%)      |
|                   | MDR 96 hours to week | 26 (0%)       | 8 (0%)               | 4 (0%)            | 0 (0%)        | 38 (0%)       |
|                   | MDR more than week   | 122 (0%)      | 42 (0%)              | 26 (10%)          | 8 (0%)        | 198 (0%)      |
|                   | no MDR bacteria      | 24091 (100%)  | 6676 (100%)          | 397 (90%)         | 268 (90%)     | 31432 (100%)  |
| 40 to 65          | MDR up to 96 hours   | 271 (0%)      | 77 (0%)              | 19 (0%)           | 10 (0%)       | 377 (0%)      |
|                   | MDR 96 hours to week | 74 (0%)       | 21 (0%)              | 2 (0%)            | 0 (0%)        | 97 (0%)       |
|                   | MDR more than week   | 352 (0%)      | 106 (0%)             | 22 (10%)          | 5 (0%)        | 485 (0%)      |
|                   | no MDR bacteria      | 16727 (100%)  | 4332 (100%)          | 359 (90%)         | 374 (100%)    | 21792 (100%)  |
| 65 to 80          | MDR up to 96 hours   | 354 (0%)      | 75 (0%)              | 5 (0%)            | 6 (0%)        | 440 (0%)      |
|                   | MDR 96 hours to week | 83 (0%)       | 18 (0%)              | 1 (0%)            | 1 (0%)        | 103 (0%)      |
|                   | MDR more than week   | 458 (0%)      | 101 (0%)             | 5 (0%)            | 3 (0%)        | 567 (0%)      |
|                   | no MDR bacteria      | 11543 (90%)   | 2218 (90%)           | 97 (90%)          | 217 (100%)    | 14075 (90%)   |
| above 80          | MDR up to 96 hours   | 404 (0%)      | 61 (10%)             | 1 (0%)            | 1 (0%)        | 467 (0%)      |
|                   | MDR 96 hours to week | 92 (0%)       | 10 (0%)              | 1 (0%)            | 0 (0%)        | 103 (0%)      |
|                   | MDR more than week   | 392 (0%)      | 56 (10%)             | 2 (10%)           | 1 (0%)        | 451 (0%)      |
|                   | no MDR bacteria      | 7476 (90%)    | 888 (90%)            | 22 (80%)          | 70 (100%)     | 8456 (90%)    |
| Total             | MDR up to 96 hours   | 1242 (0%)     | 348 (0%)             | 96 (10%)          | 36 (0%)       | 1722 (0%)     |
|                   | MDR 96 hours to week | 284 (0%)      | 68 (0%)              | 16 (0%)           | 4 (0%)        | 372 (0%)      |
|                   | MDR more than week   | 1417 (0%)     | 363 (0%)             | 89 (10%)          | 22 (0%)       | 1891 (0%)     |
|                   | no MDR bacteria      | 81262 (100%)  | 23799 (100%)         | 1452 (90%)        | 1079 (90%)    | 107592 (100%) |

MDR, multi-drug resistant

Supplementary figure

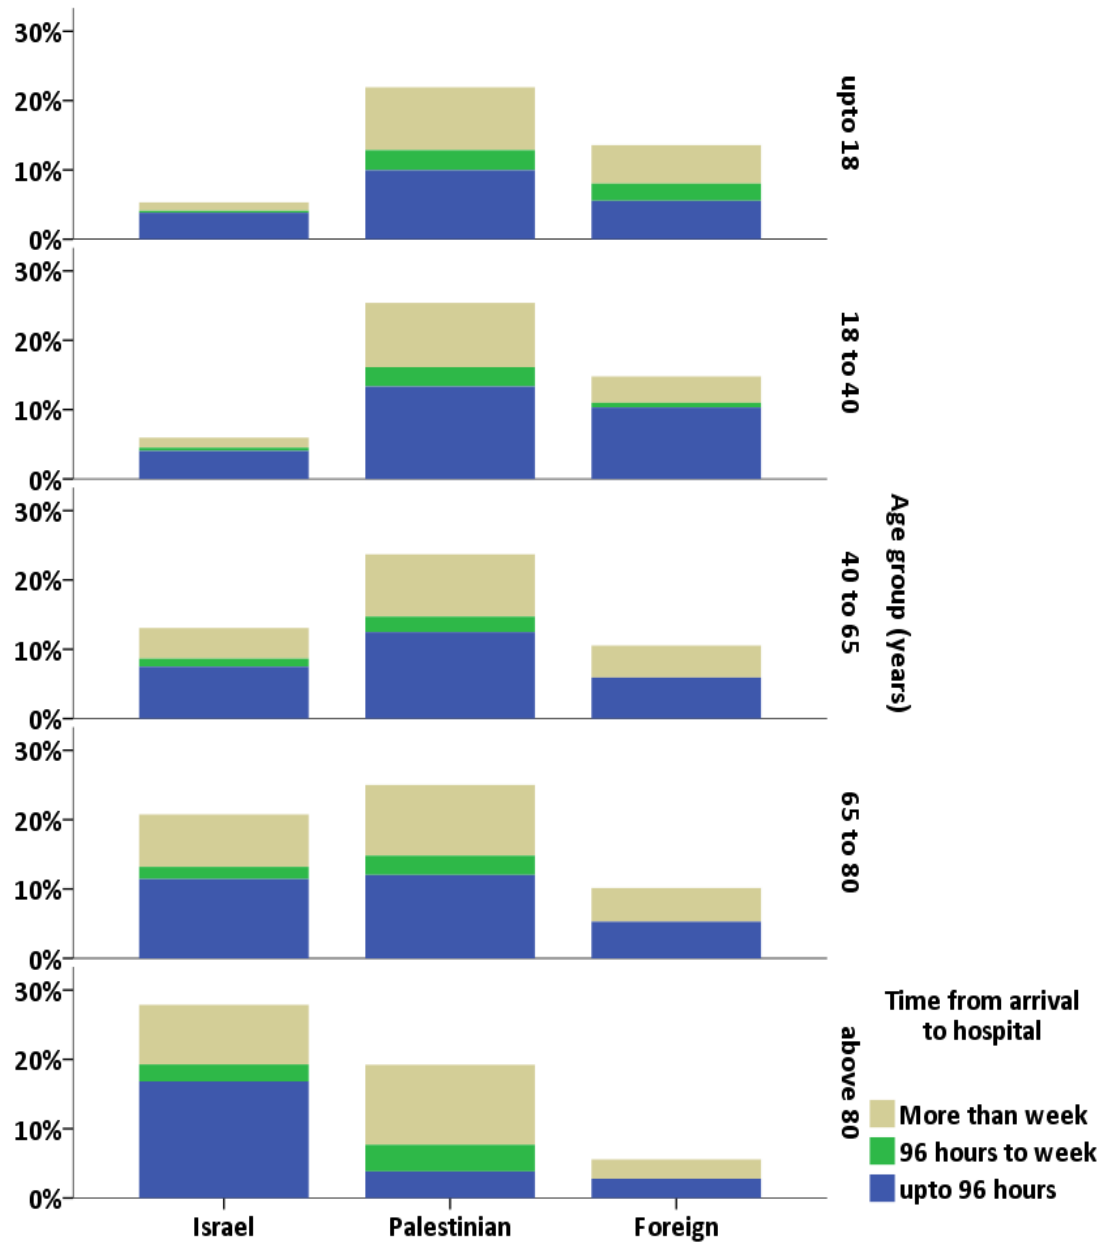

**Multi drug resistant (MDR) prevalence per age group and source population, including extended-spectrum-beta-lactamase producing Enterobacteriaceae (ESBL-PE) and carbapenem-resistant *Pseudomonas aeruginosa* (CR-PA).** Each panel depicts MDR prevalence per age group. Columns depict the cumulative MDR rate in each age group, per patient nationality. The color specifications depict the time from hospital admission to first identification of MDR bacteria.
